# Supplementary material for: Alternative Strategy for Spectral Tuning of Flavin-Binding Fluorescent Proteins
Source: PubMed Central journal article supplement (PMC9940217; doi:10.1021/acs.jpcb.2c06475), 2023-02-06
Supplement: jp2c06475_si_002.pdf [file jp2c06475_si_002.pdf]

## Supporting information for:

### An Alternative Strategy for Spectral Tuning of Flavin-binding Fluorescent Proteins

Mohammad Pabel Kabir,<sup>1</sup> Daniel Ouedraogo,<sup>1</sup> Yoelvis Orozco-Gonzalez,<sup>1,\*</sup> Giovanni Gadda,<sup>1,2,3\*</sup> Samer Gozem<sup>1,\*</sup>

<sup>1</sup>Department of Chemistry, Georgia State University, Atlanta, GA 30302, United States.

<sup>2</sup>Department of Biology, Georgia State University, Atlanta, GA 30302, United States.

<sup>3</sup>The Center for Diagnostics and Therapeutics, Georgia State University, Atlanta, GA 30302, United States.

#### Table of content

**Table S1:** Computed vertical excitation energies for iLOV and iLOV-Q430E.

**Table S2:** Computed vertical excitation energies for iLOV and iLOV-Q430E after including 4 additional NaCl ions in the simulation.

**Table S3:** Computed vertical emission energies for iLOV and iLOV-Q430E at the excited-state minimum geometry.

**Figure S1:** CASPT2//CASSCF excitation energies for lumiflavin with different active spaces.

**Figure S2:** The 10 orbitals included in the CASPT2//CASSCF active space.

**Figure S3:** iLOV and iLOV-Q430E minus free FMN difference excitation and emission spectra.

**Table S1:** CASPT2//CASSCF/ANO-L-VDZP computed ground ( $S_0$ ) and first singlet excited ( $S_1$ ) state energies. Each column refers to a step of the ASEC-FEG protocol. In addition to absolute energies (in Hartree), the  $S_0$ - $S_1$  vertical excitation energies (in eV and nm) are also shown, as well as the shift (in nm) caused by the Q430E mutation.

|                                    |                                  | Step 1               | Step 2               | Step 3               | Step 4               | Average                      |
|------------------------------------|----------------------------------|----------------------|----------------------|----------------------|----------------------|------------------------------|
| iLOV                               | $S_0$ energy (Hartree)           | -870.7066891         | -870.7208093         | -870.7258861         | -870.7170955         |                              |
|                                    | $S_1$ energy (Hartree)           | -870.5992511         | -870.6136004         | -870.6183912         | -870.6093119         |                              |
|                                    | $\Delta E_{S_1-S_0}$ (eV and nm) | 2.924 eV<br>(424 nm) | 2.917 eV<br>(425 nm) | 2.925 eV<br>(424 nm) | 2.933 eV<br>(423 nm) | <b>2.925 eV<br/>(424 nm)</b> |
| iLOV-Q430E                         | $S_0$ energy (Hartree)           | -870.6976046         | -870.6984876         | -870.6965667         | -870.6927712         |                              |
|                                    | $S_1$ energy (Hartree)           | -870.5911651         | -870.5919402         | -870.590109          | -870.5862978         |                              |
|                                    | $\Delta E_{S_1-S_0}$ (eV and nm) | 2.896 eV<br>(428 nm) | 2.899 eV<br>(428 nm) | 2.897 eV<br>(428 nm) | 2.897 eV<br>(428 nm) | <b>2.897 eV<br/>(428 nm)</b> |
| Shift caused by the Q430E mutation | $\Delta\Delta E_{S_1-S_0}$ (nm)  |                      |                      |                      |                      | <b>4 nm</b>                  |

**Table S2:** CASPT2//CASSCF/ANO-L-VDZP computed ground ( $S_0$ ) and first singlet excited ( $S_1$ ) state energies in the presence of 4 additional  $\text{Na}^+$  and  $\text{Cl}^-$  ions. Each column refers to a step of the ASEC-FEG protocol. In addition to absolute energies (in Hartree), the  $S_0$ - $S_1$  vertical excitation energies (in eV and nm) are also shown, as well as the shift (in nm) caused by the Q430E mutation.

|                                    |                                  | Step 1               | Step 2               | Step 3               | Step 4               | Average                      |
|------------------------------------|----------------------------------|----------------------|----------------------|----------------------|----------------------|------------------------------|
| iLOV                               | $S_0$ energy (Hartree)           | -870.7303668         | -870.7269008         | -870.7253756         | -870.708917          |                              |
|                                    | $S_1$ energy (Hartree)           | -870.623182          | -870.6190768         | -870.6190198         | -870.602247          |                              |
|                                    | $\Delta E_{S_1-S_0}$ (eV and nm) | 2.917 eV<br>(425 nm) | 2.934 eV<br>(423 nm) | 2.894 eV<br>(428 nm) | 2.903 eV<br>(427 nm) | <b>2.912 eV<br/>(426 nm)</b> |
| iLOV-Q430E                         | $S_0$ energy (Hartree)           | -870.7099589         | -870.7178432         | -870.7119662         | -870.6988243         |                              |
|                                    | $S_1$ energy (Hartree)           | -870.603197          | -870.6106224         | -870.605017          | -870.5911968         |                              |
|                                    | $\Delta E_{S_1-S_0}$ (eV and nm) | 2.905 eV<br>(427 nm) | 2.918 eV<br>(425 nm) | 2.910 eV<br>(426 nm) | 2.929 eV<br>(423 nm) | <b>2.915 eV<br/>(425 nm)</b> |
| Shift caused by the Q430E mutation | $\Delta\Delta E_{S_1-S_0}$ (nm)  |                      |                      |                      |                      | <b>0 nm</b>                  |

**Table S3:** CASPT2//CASSCF/ANO-L-VDZP computed ground ( $S_0$ ) and first singlet excited ( $S_1$ ) state energies at the  $S_1$  minimum geometry. Each column refers to a step of the ASEC-FEG protocol. Note that the calculations needed 3 steps to reach self-consistency, so results from Steps 1-3 were discarded. In addition to absolute energies (in Hartree), the  $S_0$ - $S_1$  vertical excitation energies (in eV and nm) are also shown, as well as the shift (in nm) caused by the Q430E mutation.

|                                    |                                  | Step 4               | Step 5               | Step 6               | Step 7               | Average                      |
|------------------------------------|----------------------------------|----------------------|----------------------|----------------------|----------------------|------------------------------|
| iLOV                               | $S_0$ energy (Hartree)           | -870.7135153         | -870.7162409         | -870.7212094         | -870.7294337         |                              |
|                                    | $S_1$ energy (Hartree)           | -870.6324525         | -870.6344888         | -870.6396116         | -870.6477739         |                              |
|                                    | $\Delta E_{S_1-S_0}$ (eV and nm) | 2.206 eV<br>(562 nm) | 2.225 eV<br>(557 nm) | 2.220 eV<br>(558 nm) | 2.222 eV<br>(558 nm) | <b>2.218 eV<br/>(559 nm)</b> |
| iLOV-Q430E                         | $S_0$ energy (Hartree)           | -870.6925643         | -870.6866233         | -870.7039868         | -870.6853863         |                              |
|                                    | $S_1$ energy (Hartree)           | -870.6124873         | -870.6063316         | -870.6236473         | -870.6050131         |                              |
|                                    | $\Delta E_{S_1-S_0}$ (eV and nm) | 2.179 eV<br>(569 nm) | 2.185 eV<br>(567 nm) | 2.186 eV<br>(567 nm) | 2.187 eV<br>(567 nm) | <b>2.184 eV<br/>(568 nm)</b> |
| Shift caused by the Q430E mutation | $\Delta\Delta E_{S_1-S_0}$ (nm)  |                      |                      |                      |                      | <b>9 nm</b>                  |

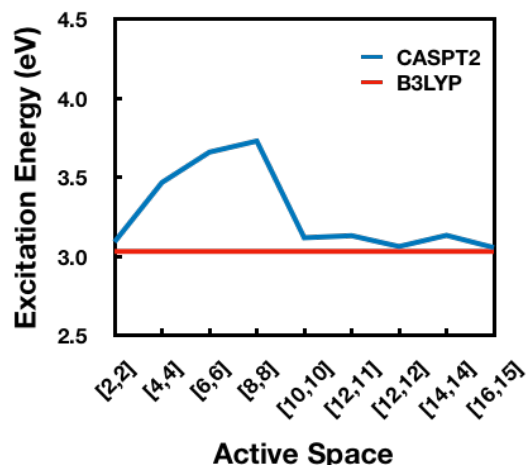

**Figure S1:** A plot of the  $S_0$ - $S_1$  excitation energy vs active space for CASPT2/ANO-L-VDZP calculations for an MP2-optimized gas-phase geometry of lumiflavin. Only  $\pi$  and  $\pi^*$  orbitals were included in the active space in all cases. The first calculation was performed using a [16,15] active space, and the active space was then reduced gradually by removing orbitals based on their occupancies. The calculations indicate that there is a limited benefit to going beyond a [10,10] active space for vertical excitation energies. The TD-DFT/cc-pVTZ excitation energy is added as a reference in red because it was found to reproduce the experimental spectrum of FMN in solution accurately when accounting for Franck-Condon factors (Kabir, M.P. et al., PCCP, 2019, 21, 16526-16537).

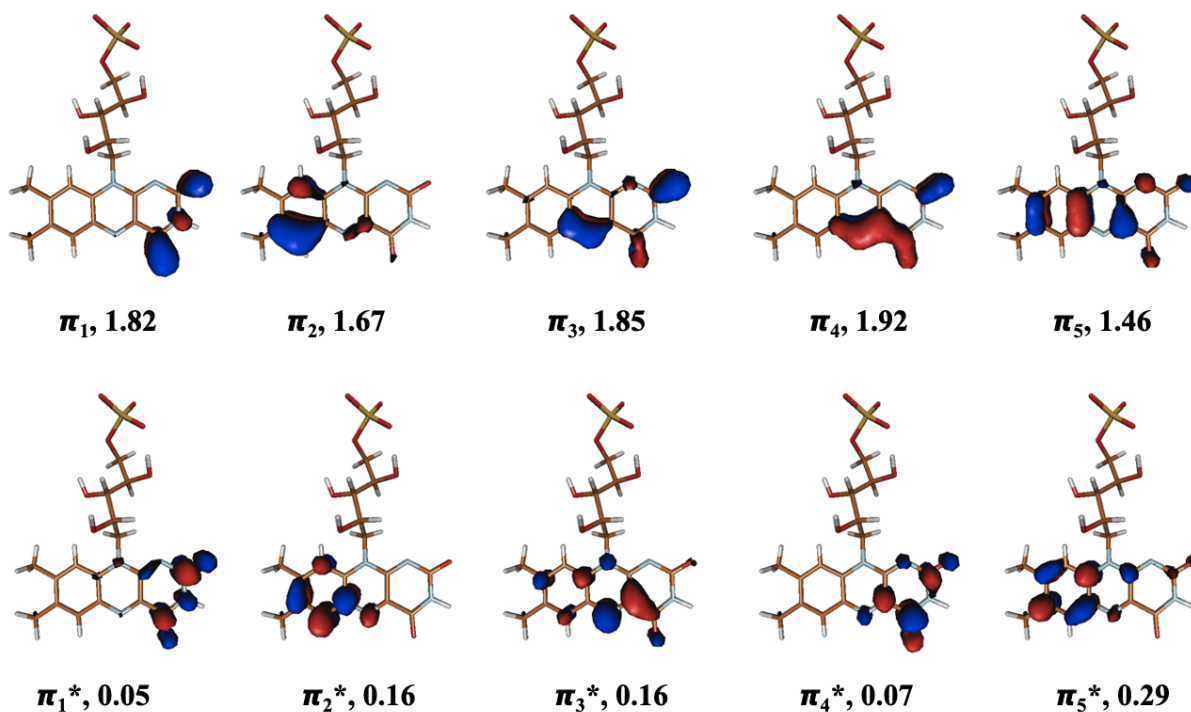

**Figure S2:** The 10 orbitals included in the CASPT2//CASSCF active space.

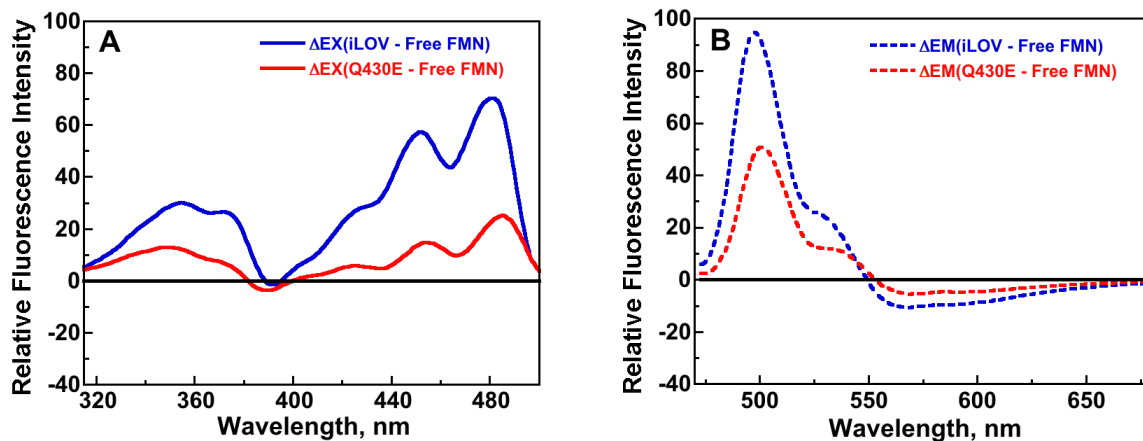

**Figure S3:** **A.** Difference excitation spectra of iLOV and iLOV-Q430E minus that of free FMN. **B.** Difference emission spectra of the iLOV and iLOV-Q430E minus that of free FMN. The reference line in panels A and B represents the  $\Delta EX$  (free FMN-Free FMN) and  $\Delta EM$  (free FMN-Free FMN), respectively.
